# Supplementary material for: Signal peptidase 21 suppresses cell proliferation, migration, and invasion via the PTEN-PI3K/Akt signaling pathway in lung adenocarcinoma
Source: PeerJ. 2022 Oct 17;10:e14206. doi: 10.7717/peerj.14206 (PMC9583857; doi:10.7717/peerj.14206)
Supplement: Supplemental Information 2 [file peerj-10-14206-s002.xlsx]

## Sheet: Sheet1
A549-CCK8		NC			siR-1			siR-2
Day1	24:00:00	97.0115	98.1609	106.628	102.375	88.5824	93.5632	127.28	114.636	118.084
Day2	48:00:00	486.973	512.644	463.985	654.406	575.096	578.544	705.364	738.697	820.69
Day3	72:00:00	506.13	533.716	481.609	740.23	707.663	727.203	805.364	808.812	819.157
Day4	96:00:00	667.05	569.732	587.739	1107.28	1063.98	1071.65	1189.66	1218.39	1154.41
NCI- H299-CCK8		NC			siR-1			siR-2
Day1	24:00:00	106.639	89.6266	103.734	96.2656	86.3071	106.266	107.178	100.954	90.9959
Day2	48:00:00	344.398	325.726	331.12	358.091	337.759	395.768	505.809	521.162	439.419
Day3	72:00:00	560.581	560.581	540.581	656.432	706.639	627.386	674.689	673.859	723.237
Day4	96:00:00	721.577	703.817	691.328	922.822	927.386	1017.43	1090.04	968.88	1065.56
H1299-siR-2+MK-CCK8		NC			siR-1			siR-2
Day1	24:00:00	106.639	89.6266	103.734	107.178	100.954	90.9959	103.24	104.333	99.1426
Day2	48:00:00	344.398	325.726	331.12	505.809	521.162	439.419	384.967	375.668	431.333
Day3	72:00:00	560.581	560.581	540.581	674.689	673.859	723.237	584.119	601.487	547.2
Day4	96:00:00	721.577	703.817	691.328	1090.04	968.88	1065.56	702.639	674.735	666.268
A549 SPC21 mRNA
NC			siR-1			siR-2			siR-3
0.99	0.98	1.03	0.22	0.215	0.235	0.291	0.345	0.302	0.637	0.701	0.698
NCI-H1299 SPC21 mRNA
NC			siR-1			siR-2			siR-3
0.995	0.964	1.067	0.182	0.223	0.265	0.199	0.152	0.201	0.746	0.761	0.823
